1 **Prevalence of short peer reviews in leading general medical journals: a study of**  
2 **peer-review length at The BMJ, PLOS Medicine, and BMC Medicine**

3 Pascal Geldsetzer<sup>1,2,\*†</sup>, Markus Heemann<sup>3,\*</sup>, Pauli Tikka<sup>4</sup>, Grace Wang<sup>5</sup>, Marika Mae Cusick<sup>6</sup>, Ali  
4 Lenjani<sup>1</sup>, Nandita Krishnan<sup>1</sup>

5

6 <sup>1</sup> Division of Primary Care and Population Health, Department of Medicine, Stanford University,  
7 Stanford, CA 94305, USA

8 <sup>2</sup> Chan Zuckerberg Biohub – San Francisco, San Francisco, CA 94158, USA

9 <sup>3</sup> Department of Development Economics, Centre for Modern Indian Studies, University of  
10 Goettingen, Waldweg 26, 37073 Göttingen, Germany

11 <sup>4</sup> Institute of Biotechnology, University of Helsinki, 00790 Helsinki, Finland

12 <sup>5</sup> Department of Biology, Stanford University, Stanford, CA 94305, USA

13 <sup>6</sup> Department of Health Policy, Stanford University, Stanford, CA 94305, USA

14

15 \* Joint first authorship

16 † Correspondence to: Pascal Geldsetzer, Division of Primary Care and Population Health, Department  
17 of Medicine, 1265 Welch Road, Stanford, CA 94305, USA; [pgeldsetzer@stanford.edu](mailto:pgeldsetzer@stanford.edu)

## 18 **Abstract**

19 **Background:** High-quality peer reviews are often thought to be essential to ensuring the integrity of the  
20 scientific publication process but measuring peer review quality is challenging. Although imperfect,  
21 review word count could serve as a simple, objective metric of review quality. We aimed to examine  
22 the prevalence of very short reviews and how often they inform editorial decisions on research articles  
23 in leading general medical journals.

24 **Methods:** We compiled a data set of peer reviews from published full-length original research articles  
25 in The BMJ, BMC Medicine, and PLOS Medicine for the years 2003 to 2022. In our primary analyses,  
26 we used a threshold of <200 words to calculate the prevalence of very short reviews. In secondary  
27 analyses, we also used thresholds of <100 and <300 words. In addition to disaggregating results by  
28 journal and year, we plotted the proportion of articles for which the first editorial decision was made  
29 based on a set of peer reviews in which very short reviews constituted 100%,  $\geq 50\%$ ,  $\geq 33\%$ , or  $\geq 20\%$  of  
30 the reviews.

31 **Results:** In this sample of 11,466 reviews corresponding to 4,038 published articles, the median review  
32 word count was 425 (Interquartile Range=253–675), and the mean was 520 (Standard Deviation=401).  
33 The overall prevalence of very short (<200 words) reviews was 17.1% [95% CI: 16.4%–17.8%]. Across  
34 the three journals, 20.9% [95% CI: 19.6%–22.2%] of initial editorial decisions were based on review  
35 sets containing  $\geq 50\%$  very short reviews. The prevalence of very short reviews and share of editorial  
36 decisions based on review sets containing  $\geq 50\%$  very short reviews was highest for BMC Medicine at  
37 26.8% [95% CI: 25.1%–28.5%] and lowest for The BMJ at 7.3% [95% CI: 5.7%–8.9%].

38 **Conclusions:** A substantial proportion of initial editorial decisions for published articles in these three  
39 leading general medical journals was based on peer reviews of such short length that they were unlikely  
40 to be of high quality. Future research should determine whether monitoring peer review length is a useful  
41 approach to improving the quality of the peer review process and which interventions, such as incentives  
42 and norm-based interventions, are most effective in soliciting more detailed reviews.

43

44

## 45 **Introduction**

46 For many decades, peer review has been the key process on which the scientific community has relied  
47 to ensure that the reporting of research findings meets minimum quality standards.<sup>1</sup> Peer review has  
48 become an established part of the scientific publication process and is used by most journals  
49 worldwide.<sup>2,3</sup> Despite its widespread use, several deficiencies of the peer review process have been  
50 noted, such as the high cost and time burden on researchers. Aczel et al. estimated that researchers spent  
51 a total of over 100 million hours on peer review in 2020 alone, which translates to a monetary value  
52 between USD 400 million and 1.5 billion.<sup>4</sup>

53 Another deficiency is the duration of the peer review process, which can lead to delays in disseminating  
54 research findings. A systematic review found that the time from submission to publication for  
55 biomedical journals ranged from a few months to almost two years.<sup>5</sup> Publication delays are especially  
56 problematic when research findings have time-sensitive implications for clinical guidelines and public  
57 health policies, as recently highlighted by the COVID-19 pandemic. Notwithstanding these deficiencies,  
58 a majority of researchers consider peer review important to ensure the quality and integrity of science.<sup>6</sup>

59 The effectiveness of peer review is contingent on its quality; however, it is unclear how prevalent low-  
60 quality reviews are and to what extent they inform editorial decisions on research articles. Likely reasons  
61 for the paucity of research in this area are the difficulty of measuring peer review quality and the lack  
62 of consensus on what constitutes quality.<sup>6</sup> To date, the most commonly used approaches to evaluate peer  
63 review quality are editor and review quality evaluations.<sup>7</sup> These typically consist of one or more items  
64 rated using Likert scales. Several scales have been developed but their validity has not been established.<sup>7</sup>  
65 Additionally, these evaluations place an added burden on editors.<sup>6</sup>

66 Review volume (i.e., word count) could be a simple, objective metric for assessing peer review quality.  
67 A common recommendation in guides for conducting peer review is to provide comments that are  
68 sufficiently detailed.<sup>8,9</sup> This is based on the rationale that a minimum number of words is required to  
69 provide constructive feedback. Review volume is certainly not a perfect measure of peer review quality.  
70 It is, after all, possible that a manuscript is of such outstanding quality that it cannot be further improved,

71 such that a reviewer may not feel the need to provide more detailed comments. Conversely, a review  
72 that is long may not necessarily be a high-quality review if it lacks substantive content. Nevertheless,  
73 our study is based on the premise that whether or not a review is very short holds some valuable  
74 information in reflecting review quality. This premise is supported by research by Yadav et al., who  
75 found that review volume was strongly positively correlated with overall review quality.<sup>10</sup> Additionally,  
76 a recent preprint study found that lengthier reviews were positively associated with the number of  
77 citations received by the article (arguably a measure of article quality).<sup>11</sup>

78 Thus, under the assumption that a very low word count reflects at least to some degree the quality of a  
79 peer review, this study aimed to determine the prevalence of very short peer reviews in three leading  
80 general medical journals – The BMJ, PLOS Medicine, and BMC Medicine. We defined very short  
81 reviews as having <200 words in our primary analyses, but – because there is no objective criterion to  
82 define such a word count threshold – also used additional cutoffs of <100 and <300 words in secondary  
83 analyses. We further aimed to determine the proportion of published research articles in these three  
84 journals for which initial editorial decisions were made based on very short peer reviews. We focused  
85 on leading general medical journals, reasoning that if high-tier journals must often rely on low-quality  
86 reviews, lower-tier journals are likely to do so even more frequently.

87

## 88 **Methods**

### 89 *Data sources*

90 We selected all journals in the “Medicine, General & Internal” category of Clarivate’s Journal Citation  
91 Reports that were among the 20 journals with the highest 2020 Journal Impact Factor and have published  
92 peer review reports of at least a subset of full-length research articles that have appeared in the journal.<sup>12</sup>  
93 We used the 2020 Journal Impact Factor to avoid the possibly transient effects of the COVID-19  
94 pandemic on journal rankings by impact factor. Three journals met these criteria: The BMJ, BMC  
95 Medicine, and PLOS Medicine. While The BMJ has a fully open peer review process that publishes the  
96 peer review history and reviewer names by default, BMC Medicine runs a peer review process in which

97 peer review history is published, but reviewers are given the choice to disclose their identity. PLOS  
98 Medicine lets authors opt-in to publish the peer review history of their accepted manuscript and only  
99 discloses reviewer names if the reviewer chooses to sign their review. All three journals publish the pre-  
100 publication history of accepted manuscripts, which includes all previous versions of the manuscript,  
101 reviewer comments at each stage, and authors' responses to comments from reviewers and editors.<sup>13,14</sup>  
102 Only The BMJ provides the self-reported job title of the reviewer.

103 The BMJ began publishing peer reviews in 2015, BMC Medicine in 2003, and PLOS Medicine in 2019.  
104 The most recent impact factors (2021) of these journals were: 96.21 (The BMJ), 11.81 (BMC Medicine),  
105 and 11.61 (PLOS Medicine).<sup>15</sup> Our analysis covered peer reviews published through December 2022  
106 for all journals. We restricted our analysis to peer reviews of full-length original research articles as  
107 word count cutoffs for defining quality may be different for peer reviews of shorter research works, such  
108 as brief reports. Because none of the three journals publish reviews for articles that were outright  
109 rejected, our sample consisted only of reviews for articles that were eventually published. Only the first  
110 set of peer reviews that an article received (i.e., reviews used to arrive at an initial editorial decision of  
111 accept or revise and resubmit) was included in the analysis. The three journals did not openly make  
112 available peer reviews for all research articles published; however, if peer reviews for an article were  
113 made available openly, all (rather than a subset) peer reviews that the article received were made  
114 available. We developed code in Python to count the words of each published peer review. The scraping  
115 of peer review reports from the journal websites was carried out between 25<sup>th</sup> November 2022 and  
116 January 27<sup>th</sup> 2023.

### 117 *Definition of peer review quality*

118 In our primary analysis, we defined very short peer reviews as those containing <200 words. Although  
119 there is no objective criterion to inform the selection of a word count threshold that best reflects peer  
120 review quality, we chose the cutoff of <200 words for the following reasons. Given that the three  
121 journals have abstract lengths between 250-350 words, we believe that reviews that are significantly  
122 shorter than a high-level manuscript summary are unlikely to provide sufficiently detailed feedback.  
123 Additionally, established instruments for measuring the quality of peer review, such as the JBJS-Peer

124 Review scoring scale, have used 200 words as the minimum word count threshold that corresponds to  
125 the highest scoring category.<sup>16</sup> Nevertheless, we recognize that there is some subjectivity to selecting  
126 this cutoff and therefore, also present results using cutoffs of <100 and <300 words.

### 127 *Statistical analysis*

128 We created plots to examine the distribution of the number of words across peer reviews and the number  
129 of reviews across research articles for all journals and years combined. We also calculated the  
130 distribution (mean and median) of the number of reviews per article and words per review disaggregated  
131 by journal and year. We used the Kruskal-Wallis test to assess significant differences in median review  
132 word counts across journals. To test for significant differences in mean review word counts across  
133 journals, we used one-way ANOVA with the Holm's method to adjust for multiple comparisons.<sup>17</sup>  
134 Following this, we categorized word counts of peer reviews (0-99; 100-199; 200-299; 300-399; 400-  
135 499; 500+) and calculated the prevalence of reviews for each word count category by year for each  
136 journal.

137 Given the importance of the first editorial decision, we analyzed the proportion of articles for which this  
138 initial decision was based on very short peer reviews (i.e., reviews of <200 words). For each article, we  
139 categorized its associated peer reviews into one of four groups (that were not mutually exclusive) based  
140 on the proportion of very short reviews in the set. A set was classified as containing 100% very short  
141 reviews (i.e., all reviews in the set were <200 words);  $\geq 50\%$  very short reviews (i.e., at least half of the  
142 reviews in the set were <200 words);  $\geq 33\%$  very short reviews (i.e., at least a third of reviews in the set  
143 were <200 words); and  $\geq 20\%$  very short reviews (i.e., at least a fifth of reviews in the set were <200  
144 words). We plotted the proportion of articles for which the first editorial decision was made based on  
145 the proportion of very short reviews in the set for each journal and for all journals combined. We  
146 repeated the same analyses using word count cutoffs of <100 and <300 words.

147 Finally, we also plotted the distribution of peer review word count by reviewer seniority for reviews  
148 from The BMJ. We defined senior scientists as those whose self-reported job title contained any of the  
149 following terms: professor (excluding those with the addition of "assistant" or associate"), dean, head,  
150 chief, director or chair. All other reviewers were classified as junior scientists.

## 151 Results

152 Our dataset consisted of 11,466 reviews corresponding to 4,038 articles. The distribution of the number  
153 of peer reviews per article showed that a little less than half (42.7% [95% CI: 41.2% – 44.2%]) of all  
154 included articles received two reviews (Figure 1). A notable exception was PLOS Medicine, where  
155 almost half (49.9% [95% CI: 45.0% – 54.7%]) of all articles received four initial reviews (Figure S1).  
156 Regarding the distribution of the number of words per review, the highest proportion of reviews had  
157 approximately 250 words (Figure 1). The distribution was right skewed, with 5.9% of reviews  
158 containing <100 words; 17.1% containing <200 words; 72.7% containing between 200 and 1,000 words;  
159 and few (10.2%) containing >1,000 words. Distributions of word counts per peer review and reviews  
160 per research article by journal and year are shown in the Supplementary Material (Figures S1, S2, S3,  
161 S4).

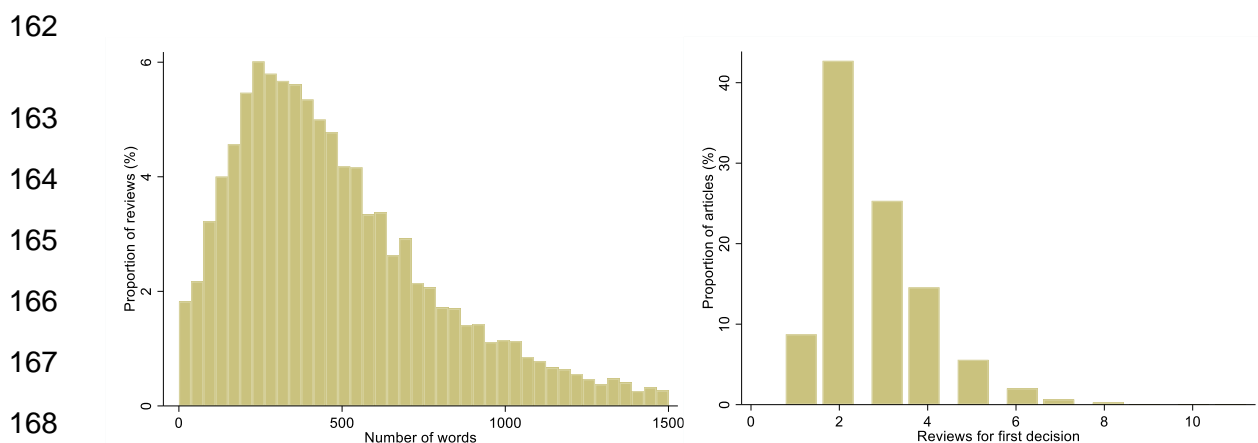

169 **Figure 1. Distribution of the number of words per peer review and the number of peer reviews**  
170 **per research article for all years and journals combined.**

171 **Notes.** Reviews with a word count >1,500 (325 of 11,466 reviews [2.8%]) are not shown. No articles  
172 received more than nine peer reviews.

173

174 The distribution of the number of reviews per article and word count per review disaggregated by journal  
175 and year are shown in Table 1. Across all three journals and all years analyzed, the median word count  
176 per review was 425 (Interquartile Range (IQR): 253–675), and the mean was 520 (SD=401). The BMJ  
177 had the highest median and mean number of words per review, at 525 (IQR: 318–820) and 636.0  
178 (SD=464.4) words, respectively. BMC Medicine had the lowest median and mean number of words per

179 review, at 376 (IQR: 221–590) and 455.2 (SD=350.2) words, respectively. The Kruskal-Wallis test  
180 showed significant differences in the median review word count across all three journals ( $p<0.001$ ). The  
181 F-test for any difference in mean peer review word count across the three journals was also significant  
182 ( $p<0.001$ ). In pairwise testing, differences in the mean word count between all pairs of journals were  
183 statistically significant ( $p<0.001$ ).



| <i>Year</i> | <i># of reviews</i> | <i>Median # of reviews per article (IQR)<sup>†</sup></i> | <i>Median # of words per review (IQR)</i> | <i># of reviews</i> | <i>Median # of reviews per article (IQR)<sup>†</sup></i> | <i>Median # of words per review (IQR)</i> | <i># of reviews</i> | <i>Median # of reviews per article (IQR)<sup>†</sup></i> | <i>Median # of words per review (IQR)</i> | <i># of reviews</i>  | <i>Median # of reviews per article (IQR)<sup>†</sup></i> | <i>Median # of words per review (IQR)</i> |
|-------------|---------------------|----------------------------------------------------------|-------------------------------------------|---------------------|----------------------------------------------------------|-------------------------------------------|---------------------|----------------------------------------------------------|-------------------------------------------|----------------------|----------------------------------------------------------|-------------------------------------------|
|             | <b>All Journals</b> |                                                          |                                           | <b>BMC Medicine</b> |                                                          |                                           | <b>The BMJ</b>      |                                                          |                                           | <b>PLOS Medicine</b> |                                                          |                                           |
| All years   | 11466               | 3 (2, 3)                                                 | 425 (253, 675)                            | 6086                | 2 (2, 3)                                                 | 376 (221, 590)                            | 3816                | 4 (3, 5)                                                 | 525 (318, 820)                            | 1564                 | 4 (3, 4)                                                 | 411 (254, 652.5)                          |
| 2003        | 4                   | 2 (2, 2)                                                 | 416 (206.5, 1048)                         | 4                   | 2 (2, 2)                                                 | 416 (206.5, 1048)                         | NA                  | NA                                                       | NA                                        | NA                   | NA                                                       | NA                                        |
| 2004        | 65                  | 2 (2, 2)                                                 | 393 (199, 580)                            | 65                  | 2 (2, 2)                                                 | 393 (199, 580)                            | NA                  | NA                                                       | NA                                        | NA                   | NA                                                       | NA                                        |
| 2005        | 28                  | 2 (1, 3)                                                 | 270 (156.5, 421)                          | 28                  | 2 (1, 3)                                                 | 270 (156.5, 421)                          | NA                  | NA                                                       | NA                                        | NA                   | NA                                                       | NA                                        |
| 2006        | 60                  | 2 (2, 3)                                                 | 357 (256, 575)                            | 60                  | 2 (2, 3)                                                 | 357 (256, 575)                            | NA                  | NA                                                       | NA                                        | NA                   | NA                                                       | NA                                        |
| 2007        | 71                  | 2 (2, 3)                                                 | 438 (256, 645)                            | 71                  | 2 (2, 3)                                                 | 438 (256, 645)                            | NA                  | NA                                                       | NA                                        | NA                   | NA                                                       | NA                                        |
| 2008        | 37                  | 2 (2, 3)                                                 | 325 (240, 580)                            | 37                  | 2 (2, 3)                                                 | 325 (240, 580)                            | NA                  | NA                                                       | NA                                        | NA                   | NA                                                       | NA                                        |
| 2009        | 33                  | 2 (2, 2)                                                 | 380 (232, 520)                            | 33                  | 2 (2, 2)                                                 | 380 (232, 520)                            | NA                  | NA                                                       | NA                                        | NA                   | NA                                                       | NA                                        |
| 2010        | 70                  | 2 (2, 3)                                                 | 290 (165, 559)                            | 70                  | 2 (2, 3)                                                 | 290 (165, 559)                            | NA                  | NA                                                       | NA                                        | NA                   | NA                                                       | NA                                        |
| 2011        | 148                 | 2 (2, 3)                                                 | 316 (180.5, 501.5)                        | 148                 | 2 (2, 3)                                                 | 316 (180.5, 501.5)                        | NA                  | NA                                                       | NA                                        | NA                   | NA                                                       | NA                                        |
| 2012        | 221                 | 2 (2, 3)                                                 | 282 (145, 470)                            | 221                 | 2 (2, 3)                                                 | 282 (145, 470)                            | NA                  | NA                                                       | NA                                        | NA                   | NA                                                       | NA                                        |
| 2013        | 333                 | 2 (2, 3)                                                 | 313 (172, 529)                            | 333                 | 2 (2, 3)                                                 | 313 (172, 529)                            | NA                  | NA                                                       | NA                                        | NA                   | NA                                                       | NA                                        |
| 2014        | 313                 | 2 (2, 2)                                                 | 335 (198, 563)                            | 313                 | 2 (2, 2)                                                 | 335 (198, 563)                            | NA                  | NA                                                       | NA                                        | NA                   | NA                                                       | NA                                        |
| 2015        | 671                 | 2 (2, 3)                                                 | 406 (240, 683)                            | 380                 | 2 (2, 2)                                                 | 345.5 (195.5, 582.5)                      | 291                 | 3 (2, 4)                                                 | 482 (309, 762)                            | NA                   | NA                                                       | NA                                        |
| 2016        | 679                 | 2 (1, 3)                                                 | 538 (336, 819)                            | 204                 | 1 (1, 2)                                                 | 404 (211.5, 628.5)                        | 475                 | 3 (2, 4)                                                 | 576 (389, 978)                            | NA                   | NA                                                       | NA                                        |
| 2017        | 876                 | 3 (2, 3)                                                 | 452.5 (253.5, 725.5)                      | 443                 | 2 (2, 3)                                                 | 368 (212, 591)                            | 433                 | 3 (3, 4)                                                 | 566 (314, 862)                            | NA                   | NA                                                       | NA                                        |
| 2018        | 979                 | 3 (2, 3)                                                 | 436 (262, 694)                            | 505                 | 2 (2, 3)                                                 | 391 (230, 617)                            | 474                 | 3 (3, 4)                                                 | 488 (317, 783)                            | NA                   | NA                                                       | NA                                        |
| 2019        | 1052                | 3 (2, 3)                                                 | 444.5 (270.5, 677.5)                      | 486                 | 2 (2, 3)                                                 | 411.5 (260, 605)                          | 463                 | 3 (2, 4)                                                 | 509 (298, 773)                            | 103                  | 4 (4, 4)                                                 | 381 (241, 621)                            |
| 2020        | 1824                | 3 (2, 4)                                                 | 410 (239, 683)                            | 828                 | 2 (2, 3)                                                 | 370.5 (217.5, 618)                        | 642                 | 4 (3, 5)                                                 | 531.5 (299, 794)                          | 354                  | 4 (1, 4)                                                 | 358 (191, 557)                            |
| 2021        | 1941                | 3 (2, 4)                                                 | 432 (273, 670)                            | 751                 | 3 (2, 3)                                                 | 402 (249, 579)                            | 527                 | 4 (3, 5)                                                 | 508 (308, 798)                            | 663                  | 4 (4, 4)                                                 | 417 (274, 672)                            |
| 2022        | 2061                | 3 (2, 4)                                                 | 440 (277, 678)                            | 1106                | 2 (2, 3)                                                 | 411 (261, 611)                            | 511                 | 4 (3, 5)                                                 | 517 (317, 865)                            | 444                  | 4 (4, 5)                                                 | 452.5 (281, 689)                          |

184

185 **Table 1. Distribution of the number of peer reviews per research article and word count per peer review by journal and year**

186 **Notes.** “NA” indicates that no open peer reviews were available for the given journal in that year. Only the first set of peer reviews that an article received  
187 (i.e., the peer reviews used to arrive at a first editorial decision of accept or revise and resubmit) was included in the analysis. The analysis was restricted to  
188 research articles only.

189 <sup>1</sup> The three journals did not openly make available peer reviews for all research articles published; however, if peer reviews for an article were made available  
190 openly, all (rather than a subset) peer reviews that the article received were made available.

191

192 Figure 2 shows the proportion of articles for different review word count categories by year for each  
193 journal. For all journals, peer review word counts remained relatively consistent across time. Of the  
194 three journals, BMC Medicine had the greatest proportion of overall reviews with <200 words (21.0%  
195 [95% CI: 19.9%–22.0%]) (see also Figure S1). The BMJ had the lowest proportion of reviews with  
196 <200 words (10.9% [95% CI: 9.9%–11.9%]).

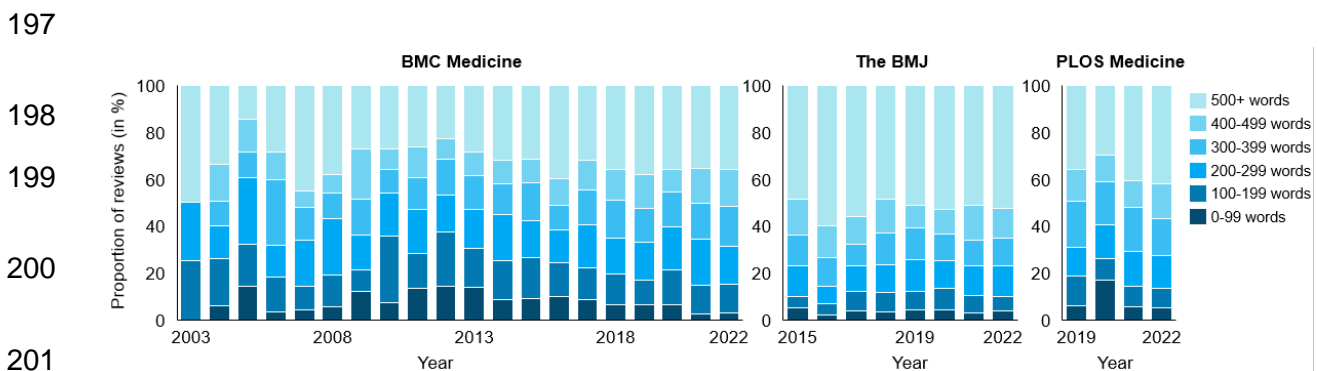

202 **Figure 2. The proportion of peer reviews in different word count categories by journal and year**

203

204 Comparing the share of very short reviews per article by applying equal article weights rather than equal  
205 review weights yielded similar results. Across all journals, 18.6% (95% CI: 17.7%–19.5%) of reviews  
206 per article contained <200 words. This proportion was highest among PLOS Medicine articles, where  
207 23.9% (95% CI: 20.8%–27.0%) of reviews per article were <200 words. For BMC Medicine and The  
208 BMJ, 20.9% (95% CI: 19.8%–22.1%) and 10.7% (95% CI: 9.6%–11.8%) of reviews contained <200  
209 words, respectively.

210 Figure 3 shows the proportion of articles for which the first editorial decision was made based on a set  
211 of peer reviews that consisted of 100%,  $\geq 50\%$ ,  $\geq 33\%$ , or  $\geq 20\%$  very short reviews. Across journals,  
212 20.9% of first editorial decisions were based on review sets containing  $\geq 50\%$  very short reviews. BMC  
213 Medicine had the highest proportion of initial editorial decisions that were based on peer review sets in  
214 which half or more of the reviews were very short (26.8% [95% CI: 25.1%–28.5%]). The BMJ had the  
215 lowest proportion of editorial decisions based on peer review sets with  $\geq 50\%$  very short reviews (7.3%  
216 [95% CI: 5.7%–8.9%]). Similar trends were observed when we used cutoffs of <100 words (Figure S5)  
217 and <300 words (Figure S6) to define very short reviews.

218  
219  
220  
221  
222  
223  
224  
225  
226  
227  
228  
229  
230  
231  
232  
233  
234

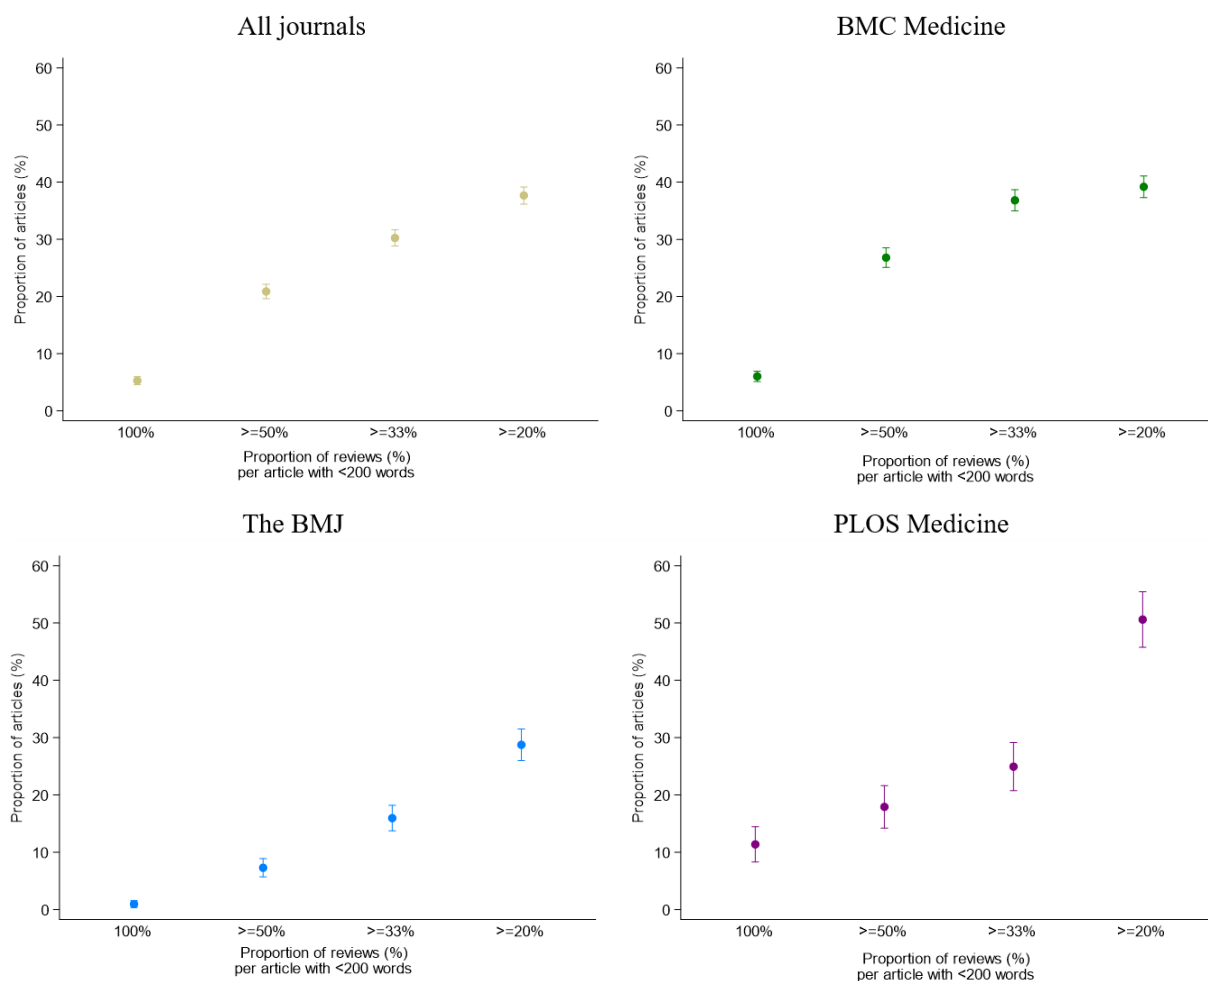

235 **Figure 3. Proportion of articles for which the first editorial decision was based on peer review**  
236 **sets consisting of 100%, ≥50%, ≥33%, or ≥20% very short (<200 words) reviews.**

237 **Notes.** The denominator for the proportion of articles is the total number of research articles that were  
238 published and for which the journal made all peer reviews openly available.

239  
240 Lastly, we analyzed the distribution of the number of words per peer review by reviewer seniority for  
241 The BMJ. The mean number of words per review was similar for senior (631.5 words [95% CI: 611.8–  
242 651.2]) and junior (643.2 words [95% CI: 618.3–668.1]) scientists. The proportion of reviews in  
243 different word count categories was also similar for senior and junior scientists. Specifically, for senior  
244 scientists, 10.1% (95% CI: 8.4%–11.8%) of reviews had <200 words; 72.3% (95% CI: 69.8%–74.8%)  
245 had 200–1000 words; and 17.6% (95% CI: 15.4%–19.7%) had >1000 words (Figure 4). For junior  
246 scientists, the corresponding percentages were 11.4% (95% CI: 10.1%–12.7%) for reviews with <200

247 words, 72.2% (95% CI: 70.3%–74.0%) for reviews between 200–1000 words, and 16.4% (95% CI:  
248 14.9%–17.9%) for reviews >1000 words (Figure 4).

249

250

251

252

253

254

255

256

257

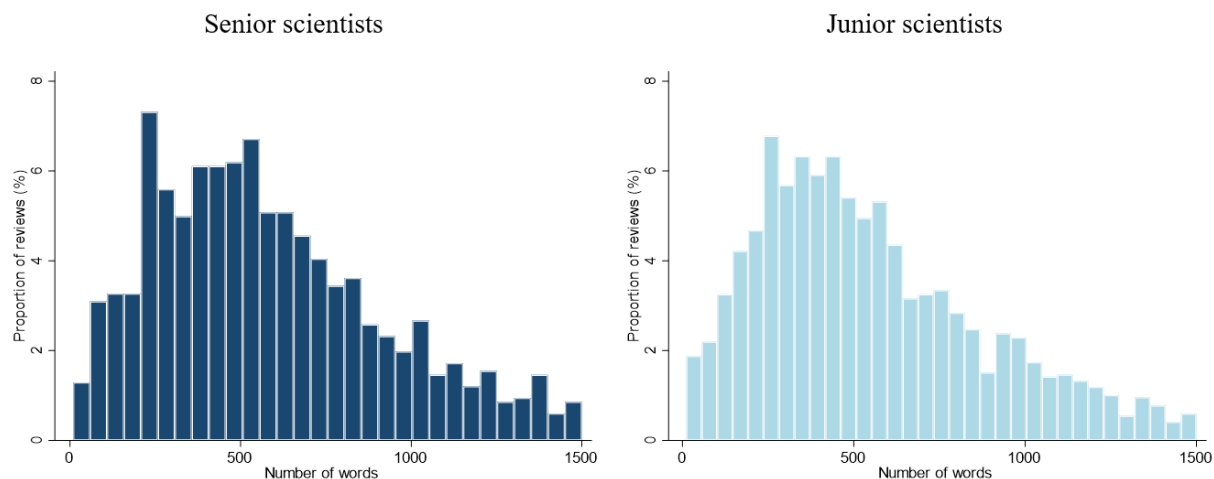

258 **Figure 4. Distribution of the number of words per peer review in The BMJ by reviewer**  
259 **seniority.**

260 **Notes.** This analysis was restricted to The BMJ (n=3,817 peer reviews) because this was the only  
261 journal that made the self-reported job title of the peer reviewer available. For 7.7% of reviews  
262 (n=292), the job titles of the reviewers were missing. Senior scientists (n=1,218) were defined as those  
263 self-reporting a job title containing any of the following terms: professor (without the addition of the  
264 words “assistant” or “associate”), dean, head, chief, director, or chair. Reviewers with all other job  
265 titles were considered junior scientists (n=2,305). Reviews with more than 1,500 words (n=181) were  
266 excluded in this figure.

267

## 268 Discussion

269 In this analysis of peer reviews from three leading medical journals, we found that – across all journals  
270 and years – 17% of reviews were very short (i.e., <200 words). We also found that one in five initial  
271 editorial decisions that eventually led to publication were based on review sets in which very short  
272 reviews accounted for half or more of the reviews. Even when using a more conservative threshold  
273 (<100 words) to define very short reviews, around one in 20 articles were published based on an initial  
274 editorial decision that had to rely on a peer review set in which such excessively short reviews  
275 constituted at least half of the reviews.

276 We identified some variation in these findings across journals. Relative to PLOS Medicine and BMC  
277 Medicine, The BMJ had significantly longer reviews on average and a lower share of very short reviews.

278 Additionally, The BMJ had the lowest proportion of editorial decisions made based on peer review sets  
279 with very short reviews. These results were consistent across word count thresholds used to define very  
280 short reviews. Review word count has been shown to be positively correlated with journal impact  
281 factor;<sup>6,18-19</sup> thus, these findings may be related to differences in journal impact factors (The BMJ: 96.21;  
282 vs. PLOS Medicine: 11.61 and BMC Medicine: 11.81). However, the mechanisms underlying this  
283 association are not fully clear. It is possible that reviewers invest more effort when conducting reviews  
284 for higher impact journals.<sup>6,19</sup> Similarly, it is possible that higher impact journals are able to identify  
285 willing reviewers that, on average, provide more thorough reviews.<sup>6</sup> We did not find significant  
286 differences in review word count by review seniority among reviews for The BMJ. This is consistent  
287 with previous research, which found that reviewer seniority was not a significant predictor of review  
288 quality.<sup>20</sup> However, other reviewer characteristics for which we did not have data may also be relevant.  
289 For instance, some data suggest that reviewers from predominantly English-speaking countries tend to  
290 write longer reviews, and it is possible that higher impact journals are more likely to solicit reviewers  
291 from these countries.<sup>6,19</sup>

292 The differences in the prevalence of very short peer reviews across the three journals in our study could  
293 also stem from differences in the design of the peer review process itself. Of the three journals examined,  
294 only The BMJ has a completely open peer review process, in which the reviews and names of reviewers  
295 are published by default without the ability to opt-out. Additionally, based on information provided by  
296 each of the journals on their websites, it appears that The BMJ provides the most incentives (all non-  
297 monetary) for reviewers (e.g., APC discounts, CME credits, reviewer certificates).<sup>21-23</sup> Such incentives  
298 could constitute a motivation to perform the reviews more diligently. It is, thus, possible that increasing  
299 accountability and providing incentives are effective approaches to encourage reviewers to provide more  
300 detailed reviews.<sup>24,25</sup> Norm-based interventions have a strong evidence base for changing behaviors  
301 across various contexts and could also potentially be effective in this context.<sup>26</sup> Future studies could  
302 investigate the impact on review word count of interventions that target norms, such as posting sample  
303 reviews and indicating to reviewers how the word count of their review compares on average to other  
304 reviews for similar articles.<sup>27</sup>

305 We reiterate that using word count as a measure of review quality has limitations. A review could be  
306 very short because the article had no flaws that merited critiquing. Similarly, a longer review may not  
307 necessarily be of higher quality if it does not provide competent feedback. Thus, other attributes of a  
308 review, such as its relevance and coverage, should ideally also be considered when assessing review  
309 quality.<sup>27</sup> Nevertheless, word count appears to be an important component of quality<sup>10</sup> and is a simple  
310 and easily computable metric. We also acknowledge that our selection of a cutoff of <200 words to  
311 define very short reviews is arbitrary. Recognizing this limitation, we show all results using alternative  
312 cutoffs.

313 An additional limitation of our study is that we only had access to the review history for those articles  
314 that were eventually published. Furthermore, in the case of PLOS medicine, authors had to actively opt-  
315 in to make the review history for their article publicly available. Thus, it is unclear whether our findings  
316 generalize to reviews of articles that were rejected or for which reviews were not made available. We  
317 also only analyzed data from three medical journals, which is a small sample. However, given that these  
318 three journals are high-impact general medical journals, we believe that our estimates are conservative  
319 for the medical field more generally based on the assumption that it is likely that lower-tier journals  
320 have a higher prevalence of very short reports and rely more frequently on these types of reports to make  
321 editorial decisions.

322 Our findings show a substantial prevalence of very short reviews in three leading general medical  
323 journals, such that roughly one in five editorial decisions are made based on review sets in which reviews  
324 of <200 words constitute half or more of the reviews. Future studies could investigate whether  
325 monitoring peer review length is a useful approach to improving the quality of the peer review process.  
326 Future research could also assess the effectiveness of different interventions, such as incentives and  
327 norm-based interventions, in eliciting more detailed reviews.

328

### 329 **Author Contributions**

330 Concept and design: Geldsetzer

331 Acquisition of Data: Lenjani, Tikka

332 Statistical analysis and interpretation of data: Geldsetzer, Heemann, Wang, Cusick, Krishnan

333 Drafting of the manuscript: Geldsetzer, Heemann, Wang, Krishnan

334 Critical revision of the manuscript for important intellectual content: Geldsetzer, Heemann, Tikka,

335 Wang, Cusick, Lenjani, Krishnan

336 Supervision: Geldsetzer

337

## 338 **References**

339 1. Farrell PR, Magida Farrell L, Farrell MK. Ancient texts to PubMed: a brief history of the peer-  
340 review process. *J Perinatol*. 2017;37(1):13-15. doi:10.1038/jp.2016.209

341 2. Kelly J, Sadeghieh T, Adeli K. Peer Review in Scientific Publications: Benefits, Critiques, & A  
342 Survival Guide. *EJIFCC*. 2014;25(3):227-243. Published 2014 Oct 24.

343 3. Peh WC. Peer review: concepts, variants and controversies. *Singapore Med J*. 2022;63(2):55-60.  
344 doi:10.11622/smedj.20211394

345 4. Aczel B, Szaszi B, Holcombe AO. A billion-dollar donation: estimating the cost of researchers'  
346 time spent on peer review. *Res Integr Peer Rev*. 2021;6(1):14. Published 2021 Nov 14.  
347 doi:10.1186/s41073-021-00118-2

348 5. Andersen MZ, Fonnes S, Rosenberg J. Time from submission to publication varied widely for  
349 biomedical journals: a systematic review. *Curr Med Res Opin*. 2021;37(6):985-993.  
350 doi:10.1080/03007995.2021.1905622

351 6. Global state of peer review. *Publons*. 2018. doi: <https://doi.org/10.14322/publons.GSPR2018>



- 352 7. Superchi C, González JA, Solà I, Cobo E, Hren D, Boutron I. Tools used to assess the quality of  
353 peer review reports: a methodological systematic review. *BMC Med Res Methodol*.  
354 2019;19(1):48. Published 2019 Mar 6. doi:10.1186/s12874-019-0688-x
- 355 8. Elsevier. How to conduct a review. <https://www.elsevier.com/reviewers/how-to-review>
- 356 9. Mathioudakis AG, Wagner D, Dumas O. How to peer review: practical advice for early career  
357 researchers. *Breathe (Sheff)*. 2022;18(4):220160. doi:10.1183/20734735.0160-2022
- 358 10. Yadav RK. Web services for automated assessment of reviews. *Master's thesis, NC State*  
359 *University*. 2016.
- 360 11. Abdelghani Maddi & Luis Miotti. On The Peer Review Reports: Does Size Matter?, 06 January  
361 2023, PREPRINT (Version 1) available at Research Square [[https://doi.org/10.21203/rs.3.rs-](https://doi.org/10.21203/rs.3.rs-2410967/v1)  
362 [2410967/v1](https://doi.org/10.21203/rs.3.rs-2410967/v1)]
- 363 12. Clarivate.com Journal Browser, <https://jcr.clarivate.com/jcr/browse-journals> , last accessed  
364 November 2022
- 365 13. Groves, T. & Loder, E. Prepublication histories and open peer review at The BMJ. *BMJ* **349**,  
366 g5394–g5394 (2014).
- 367 14. BMC Medicine. *BioMed Central* [https://bmcmmedicine.biomedcentral.com/submission-](https://bmcmmedicine.biomedcentral.com/submission-guidelines/peer-review-policy)  
368 [guidelines/peer-review-policy](https://bmcmmedicine.biomedcentral.com/submission-guidelines/peer-review-policy).
- 369 15. Journal Citation Reports. 2021 Journal Impact Factor. *Clarivate*. 2021.
- 370 16. Thompson SR, Agel J, & Losina E. The JBJS Peer-Review Scoring Scale: A valid, reliable  
371 instrument for measuring the quality of peer review reports. *Learned Publishing*. 2016;29(1):23-  
372 25. <https://doi.org/10.1002/leap.1009>
- 373 17. Holm S. A Simple Sequentially Rejective Multiple Test Procedure. *Scandinavian Journal of*  
374 *Statistics*. 1979;6(2):65-70.

- 375 18. Severin A, Strinzel M, Egger M, Barros T, Sokolov A, Mouatt JV, & Müller S. Journal Impact  
376 Factor and Peer Review Thoroughness and Helpfulness: A Supervised Machine Learning  
377 Study. *ArXiv*, *abs/2207.09821*. 2022.
- 378 19. Clarivate. It's not the size that matters. 2018. [https://clarivate.com/blog/its-not-the-size-that-](https://clarivate.com/blog/its-not-the-size-that-matters/)  
379 [matters/](https://clarivate.com/blog/its-not-the-size-that-matters/)
- 380 20. Black N, van Rooyen S, Godlee F, Smith R, Evans S. What makes a good reviewer and a good  
381 review for a general medical journal?. *JAMA*. 1998;280(3):231-233. doi:10.1001/jama.280.3.231
- 382 21. BMC Medicine, “Reviewer acknowledgments”,  
383 <https://bmcmmedicine.biomedcentral.com/reviewer-acknowledgements>, last accessed 25.04.2023
- 384 22. BMJ, “Recognition for Reviewers”, <https://authors.bmj.com/for-reviewers/reviewer-recognition/>,  
385 last accessed 25.04.2023
- 386 23. PLOS Medicine, “Guidelines for Reviewers”, [https://journals.plos.org/plosmedicine/s/reviewer-](https://journals.plos.org/plosmedicine/s/reviewer-guidelines#:~:text=Keep%20manuscripts%20and%20correspondence%20confidential,through%20the%20peer%20review%20process)  
387 [guidelines#:~:text=Keep%20manuscripts%20and%20correspondence%20confidential,through%2](https://journals.plos.org/plosmedicine/s/reviewer-guidelines#:~:text=Keep%20manuscripts%20and%20correspondence%20confidential,through%20the%20peer%20review%20process)  
388 [0the%20peer%20review%20process](https://journals.plos.org/plosmedicine/s/reviewer-guidelines#:~:text=Keep%20manuscripts%20and%20correspondence%20confidential,through%20the%20peer%20review%20process), last accessed 25.04.2023
- 389 24. Godlee F. Making reviewers visible: openness, accountability, and credit. *JAMA*.  
390 2002;287(21):2762-2765. doi:10.1001/jama.287.21.2762
- 391 25. Radzvilas M, De Pretis F, Peden W, Tortoli W, Osimani B. Incentives for Research Effort: An  
392 Evolutionary Model of Publication Markets with Double-Blind and Open Review. *Comput Econ*.  
393 2022. <https://doi.org/10.1007/s10614-022-10250-w>
- 394 26. Miller DT, Prentice DA. Changing Norms to Change Behavior. *Annu Rev Psychol*. 2016;67:339-  
395 361. doi:10.1146/annurev-psych-010814-015013
- 396 27. Ramachandran L, Gehringer EF, & Yadav RK. Automated Assessment of the Quality of Peer  
397 Reviews using Natural Language Processing Techniques. *Int J Artif Intell Educ*. 2017;27:534–581  
398 <https://doi.org/10.1007/s40593-016-0132-x>
